# Supplementary material for: Comparative Study of Liquid Split Mechanisms for 3D-printed Laboratory Dividing Wall Columns
Source: Research Square preprint supplement (doi:10.21203/rs.3.rs-8646795/v1), 2026-02-17
Supplement: Supplementary file 1 [file d7a443d75d45c02aa0d5cba9.docx]

1. **Supporting Material**
   1. **Rotary Actuator**

- - 1. **Rotary Actuator –Data - Screening**

|  |  |  |  |  |  |  |  |
| --- | --- | --- | --- | --- | --- | --- | --- |
|  |  |  |  |  |  |  |  |
| 0.5 | 1 | 17.903 | 60 | 156.64 | 141.94 | 1.104 |  |
| 157.09 | 141.77 | 1.108 | 1.106 |
| 156.93 | 141.92 | 1.106 |  |
| 1 | 0.5 | 17.903 | 60 | 153.2 | 146.27 | 1.047 |  |
| 153.33 | 146.74 | 1.045 | 1.048 |
| 153.68 | 146.09 | 1.052 |  |
| 2 | 0.25 | 17.903 | 60 | 151.05 | 146.78 | 1.029 |  |
| 151.29 | 147.49 | 1.026 | 1.028 |
| 151.3 | 146.97 | 1.029 |  |
| 0.5 | 1 | 19.372 | 120 | 330.57 | 314.21 | 1.052 |  |
| 330.52 | 313.78 | 1.053 | 1.053 |
| 330.68 | 313.73 | 1.054 |  |
| 1 | 0.5 | 19.372 | 120 | 325.51 | 318.27 | 1.023 |  |
| 325.02 | 317.87 | 1.022 | 1.023 |
| 326.38 | 318.84 | 1.024 |  |
| 2 | 0.25 | 19.372 | 120 | 324.77 | 320.53 | 1.013 |  |
| 324.98 | 319.87 | 1.016 | 1.016 |
| 325.23 | 319.68 | 1.017 |  |
| 0.5 | 1 | 21.589 | 120 | 368.59 | 353.26 | 1.043 |  |
| 368.22 | 353.04 | 1.043 | 1.044 |
| 368.25 | 352.42 | 1.045 |  |
| 1 | 0.5 | 21.589 | 120 | 361.11 | 355.84 | 1.015 |  |
| 360.63 | 355.44 | 1.015 | 1.016 |
| 362.09 | 355.71 | 1.018 |  |
| 2 | 0.25 | 21.589 | 120 | 359.98 | 358.29 | 1.005 |  |
| 360.27 | 357.5 | 1.008 | 1.005 |
| 359.63 | 358.53 | 1.003 |  |
| 0.5 | 1 | 23.477 | 60 | 200.9 | 190.5 | 1.055 |  |
| 200.06 | 190.36 | 1.051 | 1.054 |
| 200.34 | 189.54 | 1.057 |  |
| 1 | 0.5 | 23.477 | 60 | 198.15 | 194.24 | 1.020 |  |
| 199.68 | 193.29 | 1.033 | 1.026 |
| 198.99 | 193.92 | 1.026 |  |
| 2 | 0.25 | 23.477 | 60 | 196.79 | 194.01 | 1.014 |  |
| 197.11 | 193.22 | 1.020 | 1.017 |
| 196.59 | 193.67 | 1.015 |  |
| 0.5 | 1 | 27.222 | 120 | 453.11 | 450.24 | 1.006 |  |
| 452.93 | 449.95 | 1.007 | 1.007 |
| 453.62 | 450.28 | 1.007 |  |
| 1 | 0.5 | 27.222 | 120 | 455.12 | 449.13 | 1.013 |  |
| 454.87 | 450.06 | 1.011 | 1.012 |
| 454.98 | 449.92 | 1.011 |  |
| 2 | 0.25 | 27.222 | 120 | 452.86 | 451.65 | 1.003 |  |
| 452.94 | 451.28 | 1.004 | 1.003 |
| 452.67 | 451.1 | 1.003 |  |
| 0.5 | 1 | 29.899 | 60 | 255.85 | 242.38 | 1.056 |  |
| 256.25 | 241.66 | 1.060 | 1.059 |
| 256.5 | 241.83 | 1.061 |  |
| 1 | 0.5 | 29.899 | 60 | 252.25 | 245.19 | 1.029 |  |
| 252.29 | 245.43 | 1.028 | 1.028 |
| 251.15 | 244.84 | 1.026 |  |
| 2 | 0.25 | 29.899 | 60 | 250.16 | 246.76 | 1.014 |  |
| 250.04 | 246.52 | 1.014 | 1.014 |
| 249.65 | 246.13 | 1.014 |  |

**Data for plotting**

|  |  | | |
| --- | --- | --- | --- |
|  | 1 | 0.5 | 0.25 |
|  |  |  |  |
| 17.903 | 1.106 | 1.048 | 1.028 |
| 19.372 | 1.053 | 1.023 | 1.016 |
| 21.589 | 1.044 | 1.016 | 1.005 |
| 23.477 | 1.054 | 1.026 | 1.017 |
| 27.222 | 1.007 | 1.012 | 1.003 |
| 29.899 | 1.059 | 1.028 | 1.014 |

- - 1. **Rotary Actuator – Data - Detailed Measurements - Water**

|  | 𝑓 |  | 𝑡 |  |  | 𝑆 |  |
| --- | --- | --- | --- | --- | --- | --- | --- |
| s |  | L | s | g | g | 1 | 1 |
| 0.5 | 1 | 7.101 | 120 | 118.58 | 113.62 | 1.044 |  |
| 117.46 | 113.22 | 1.037 | 1.041 |
| 117.94 | 113.26 | 1.041 |  |
| 1 | 0.5 | 7.101 | 120 | 119.02 | 116.59 | 1.021 |  |
| 119.26 | 116.84 | 1.021 | 1.021 |
| 118.33 | 115.89 | 1.021 |  |
| 2 | 0.25 | 7.101 | 120 | 117.11 | 116.23 | 1.008 |  |
| 117.62 | 116.19 | 1.012 | 1.011 |
| 117.2 | 115.67 | 1.013 |  |
| 0.5 | 1 | 9.907 | 120 | 165.19 | 163.66 | 1.009 |  |
| 165.38 | 163.82 | 1.010 | 1.012 |
| 166.44 | 163.82 | 1.016 |  |
| 1 | 0.5 | 9.907 | 120 | 165.19 | 163.94 | 1.008 |  |
| 163.99 | 164.3 | 0.998 | 1.004 |
| 165.68 | 164.79 | 1.005 |  |
| 2 | 0.25 | 9.907 | 120 | 164.02 | 164.96 | 0.994 |  |
| 165.74 | 164.67 | 1.006 | 1.002 |
| 165.46 | 164.73 | 1.004 |  |
| 0.5 | 1 | 13.989 | 120 | 231.86 | 232.11 | 0.999 |  |
| 230.71 | 232.4 | 0.993 | 0.994 |
| 231.22 | 233.35 | 0.991 |  |
| 1 | 0.5 | 13.989 | 120 | 232.69 | 232.84 | 0.999 |  |
| 232.26 | 232.63 | 0.998 | 1.001 |
| 233.41 | 232.17 | 1.005 |  |
| 2 | 0.25 | 13.989 | 120 | 233.61 | 230.85 | 1.012 |  |
| 232.6 | 230.92 | 1.007 | 1.011 |
| 233.19 | 230.17 | 1.013 |  |
| 0.5 | 1 | 17.903 | 60 | 156.64 | 141.94 | 1.104 |  |
| 157.09 | 141.77 | 1.108 | 1.106 |
| 156.93 | 141.92 | 1.106 |  |
| 1 | 0.5 | 17.903 | 60 | 153.2 | 146.27 | 1.047 |  |
| 153.33 | 146.74 | 1.045 | 1.048 |
| 153.68 | 146.09 | 1.052 |  |
| 2 | 0.25 | 17.903 | 60 | 151.05 | 146.78 | 1.029 |  |
| 151.29 | 147.49 | 1.026 | 1.028 |
| 151.3 | 146.97 | 1.029 |  |

**Data for plotting**

|  |  | | |
| --- | --- | --- | --- |
|  | 1 | 0.5 | 0.25 |
|  |  |  |  |
| 7.101 | 1.041 | 1.021 | 1.011 |
| 9.907 | 1.012 | 1.004 | 1.002 |
| 13.989 | 0.994 | 1.001 | 1.011 |
| 17.903 | 1.106 | 1.048 | 1.028 |
| 17.049 | 1.133 | 1.068 | 1.025 |

- - 1. **Rotary Actuator – Data - Detailed Measurements - Ethanol**

|  |  |  |  |  |  |  |  |
| --- | --- | --- | --- | --- | --- | --- | --- |
|  |  |  |  |  |  |  |  |
| 0.5 | 1 | 6.969 | 120 | 92.18 | 89.27 | 1.033 | 1.020 |
| 92.03 | 90.85 | 1.013 |
| 91.98 | 90.56 | 1.016 |
| 1 | 0.5 | 6.969 | 120 | 91.39 | 90.51 | 1.010 | 1.011 |
| 91.94 | 90.78 | 1.013 |
| 91.64 | 90.81 | 1.009 |
| 2 | 0.25 | 6.969 | 120 | 90.92 | 91.13 | 0.998 | 1.001 |
| 91.37 | 91.41 | 1.000 |
| 91.77 | 91.38 | 1.004 |
| 0.5 | 1 | 9.796 | 60 | 64.75 | 62.94 | 1.029 | 1.030 |
| 65.16 | 63.31 | 1.029 |
| 65.11 | 63.17 | 1.031 |
| 1 | 0.5 | 9.796 | 60 | 64.48 | 63.42 | 1.017 | 1.017 |
| 64.58 | 63.84 | 1.012 |
| 65.02 | 63.55 | 1.023 |
| 2 | 0.25 | 9.796 | 60 | 64.1 | 63.78 | 1.005 | 0.999 |
| 64.08 | 64.11 | 1.000 |
| 63.89 | 64.4 | 0.992 |
| 0.5 | 1 | 14.060 | 60 | 95.35 | 91.22 | 1.045 | 1.052 |
| 95.92 | 90.89 | 1.055 |
| 95.96 | 90.91 | 1.056 |
| 1 | 0.5 | 14.060 | 60 | 94.42 | 91.8 | 1.029 | 1.028 |
| 94.04 | 91.84 | 1.024 |
| 94.56 | 91.56 | 1.033 |
| 2 | 0.25 | 14.060 | 60 | 92.41 | 90.67 | 1.019 | 1.023 |
| 93.02 | 90.93 | 1.023 |
| 93.13 | 90.81 | 1.026 |
| 0.5 | 1 | 17.999 | 60 | 123.53 | 113.27 | 1.091 | 1.096 |
| 123.85 | 112.89 | 1.097 |
| 123.87 | 112.67 | 1.099 |
| 1 | 0.5 | 17.999 | 60 | 121.34 | 116.35 | 1.043 | 1.043 |
| 120.9 | 115.8 | 1.044 |
| 121.01 | 116.07 | 1.043 |
| 2 | 0.25 | 17.999 | 60 | 119.54 | 116.66 | 1.025 | 1.024 |
| 120.05 | 116.78 | 1.028 |
| 119.49 | 117.26 | 1.019 |

**Data for plotting**

|  |  | | |
| --- | --- | --- | --- |
|  | 1 | 0.5 | 0.25 |
|  |  |  |  |
| 6.969 | 1.020 | 1.011 | 1.001 |
| 9.796 | 1.030 | 1.017 | 0.999 |
| 14.060 | 1.052 | 1.028 | 1.023 |
| 17.999 | 1.096 | 1.043 | 1.024 |

- - 1. **Rotary Actuator – Pump Calibration – Water**

|  |  |  |  |
| --- | --- | --- | --- |
|  |  |  |  |
| 297.84 | 60 | 17.903 | 17.903 |
| 298.01 | 17.913 |
| 297.67 | 17.892 |
| 644.95 | 120 | 19.383 | 19.372 |
| 644.43 | 19.368 |
| 644.38 | 19.366 |
| 718.44 | 120 | 21.592 | 21.589 |
| 717.61 | 21.567 |
| 718.95 | 21.607 |
| 390.42 | 60 | 23.467 | 23.477 |
| 390.85 | 23.493 |
| 390.45 | 23.469 |
| 905.96 | 120 | 27.228 | 27.222 |
| 905.44 | 27.212 |
| 905.89 | 27.226 |
| 496.35 | 60 | 29.835 | 29.899 |
| 498.24 | 29.948 |
| 497.65 | 29.913 |
| 236.42 | 120 | 7.105 | 7.101 |
| 236.53 | 7.109 |
| 235.87 | 7.089 |
| 329.78 | 120 | 9.911 | 9.907 |
| 329.75 | 9.910 |
| 329.36 | 9.899 |
| 465.95 | 120 | 14.004 | 13.989 |
| 464.87 | 13.971 |
| 465.54 | 13.991 |
| 297.84 | 60 | 17.903 | 17.903 |
| 298.01 | 17.913 |
| 297.67 | 17.892 |

- - 1. **Pump Calibration – Ethanol**

|  |  |  |  |
| --- | --- | --- | --- |
|  |  |  |  |
| 183.58 | 120 | 6.980 | 6.969 |
| 183.09 | 6.962 |
| 183.22 | 6.967 |
| 128.41 | 60 | 9.765 | 9.796 |
| 128.93 | 9.805 |
| 129.11 | 9.818 |
| 184.85 | 60 | 14.057 | 14.060 |
| 184.87 | 14.059 |
| 184.93 | 14.063 |
| 236.79 | 60 | 18.007 | 17.999 |
| 236.41 | 17.978 |
| 236.85 | 18.011 |

- 1. **Linear Pneumatic Actuator**

- - 1. **Linear pneumatic actuator – Data - Screening**

|  |  |  |  |  |  |  |  |
| --- | --- | --- | --- | --- | --- | --- | --- |
|  |  |  |  |  |  |  |  |
| 0.5 | 1 | 29.557 | 60 | 219.4 | 271.3 | 0.809 |  |
| 218.4 | 271.1 | 0.806 | 0.804 |
| 217.0 | 272.0 | 0.798 |  |
| 1 | 0.5 | 29.557 | 60 | 218.7 | 273.0 | 0.801 |  |
| 218.3 | 271.8 | 0.803 | 0.802 |
| 218.4 | 272.4 | 0.802 |  |
| 2 | 0.25 | 29.557 | 60 | 213.8 | 277.8 | 0.770 |  |
| 210.9 | 278.8 | 0.756 | 0.764 |
| 212.8 | 277.9 | 0.766 |  |
| 0.5 | 1 | 26.604 | 60 | 199.0 | 243.6 | 0.817 |  |
| 197.3 | 242.3 | 0.814 | 0.813 |
| 197.8 | 245.0 | 0.807 |  |
| 1 | 0.5 | 26.604 | 60 | 195.2 | 243.7 | 0.801 |  |
| 195.4 | 243.5 | 0.802 | 0.802 |
| 196.2 | 244.2 | 0.803 |  |
| 2 | 0.25 | 26.604 | 60 | 195.0 | 245.4 | 0.795 |  |
| 194.8 | 245.2 | 0.794 | 0.794 |
| 195.2 | 245.8 | 0.794 |  |
| 0.5 | 1 | 23.523 | 60 | 178.0 | 211.8 | 0.840 |  |
| 177.9 | 213.2 | 0.834 | 0.834 |
| 176.8 | 213.7 | 0.827 |  |
| 1 | 0.5 | 23.523 | 60 | 174.9 | 210.9 | 0.829 |  |
| 175.7 | 213.5 | 0.823 | 0.835 |
| 179.1 | 209.9 | 0.853 |  |
| 2 | 0.25 | 23.523 | 60 | 177.8 | 215.2 | 0.826 |  |
| 176.1 | 214.1 | 0.823 | 0.827 |
| 177.0 | 212.3 | 0.834 |  |
| 0.5 | 1 | 20.654 | 60 | 158.8 | 186.2 | 0.853 |  |
| 158.3 | 185.4 | 0.854 | 0.855 |
| 158.3 | 184.5 | 0.858 |  |
| 1 | 0.5 | 20.654 | 60 | 158.9 | 184.6 | 0.861 |  |
| 158.7 | 183.9 | 0.863 | 0.861 |
| 158.8 | 184.7 | 0.860 |  |
| 2 | 0.25 | 20.654 | 60 | 158.4 | 184.5 | 0.859 |  |
| 158.7 | 185.1 | 0.857 | 0.856 |
| 157.5 | 184.6 | 0.853 |  |
| 0.5 | 1 | 17.641 | 60 | 136.5 | 155.9 | 0.876 |  |
| 137.2 | 155.6 | 0.882 | 0.879 |
| 136.8 | 155.3 | 0.881 |  |
| 1 | 0.5 | 17.641 | 60 | 136.4 | 154.3 | 0.884 |  |
| 137.7 | 154.8 | 0.890 | 0.888 |
| 137.0 | 154.0 | 0.890 |  |
| 2 | 0.25 | 17.641 | 60 | 139.1 | 153.8 | 0.904 |  |
| 138.8 | 153.4 | 0.905 | 0.903 |
| 138.6 | 153.8 | 0.901 |  |

**Data for plotting**

|  |  | | |
| --- | --- | --- | --- |
|  | 1 | 0.5 | 0.25 |
|  |  |  |  |
| 17.641 | 0.879 | 0.888 | 0.903 |
| 20.654 | 0.855 | 0.861 | 0.856 |
| 23.523 | 0.813 | 0.835 | 0.827 |
| 26.604 | 0.794 | 0.802 | 0.794 |
| 29.557 | 0.804 | 0.802 | 0.764 |

- - 1. **Linear Pneumatic Actuator – Pump Calibration – Water**

|  |  |  |  |
| --- | --- | --- | --- |
|  |  |  |  |
| 489.6 | 60 | 29.464 |  |
| 491.4 | 29.573 | 29.557 |
| 492.4 | 29.633 |  |
| 442.4 | 60 | 26.624 |  |
| 442.2 | 26.612 | 26.604 |
| 441.6 | 26.576 |  |
| 392 | 60 | 23.591 |  |
| 390.4 | 23.494 | 23.523 |
| 390.2 | 23.482 |  |
| 341.6 | 60 | 20.558 |  |
| 345.4 | 20.786 | 20.654 |
| 342.6 | 20.618 |  |
| 293.8 | 60 | 17.681 |  |
| 292 | 17.573 | 17.641 |
| 293.6 | 17.669 |  |

- 1. **Electromagnetic Actuator**

- - 1. **Electromagnetic Actuator – Data - Screening**

|  |  |  |  |  |  |  |  |
| --- | --- | --- | --- | --- | --- | --- | --- |
|  |  |  |  |  |  |  |  |
| 0.5 | 1 | 17.023 | 120 | 292.19 | 276.9 | 0.948 | 0.946 |
| 293.99 | 277.68 | 0.945 |
| 292.06 | 276.18 | 0.946 |
| 1 | 0.5 | 17.023 | 120 | 282.45 | 281.07 | 0.995 | 0.989 |
| 282.87 | 279.18 | 0.987 |
| 283.71 | 279.42 | 0.985 |
| 2 | 0.25 | 17.023 | 120 | 281.83 | 280.02 | 0.994 | 0.993 |
| 281.94 | 279.75 | 0.992 |
| 282.58 | 280.97 | 0.994 |
| 0.5 | 1 | 20.016 | 120 | 337.28 | 333.78 | 0.990 | 0.993 |
| 335.04 | 332.94 | 0.994 |
| 335.64 | 333.88 | 0.995 |
| 1 | 0.5 | 20.016 | 120 | 335 | 333.81 | 0.996 | 0.998 |
| 334.34 | 334.73 | 1.001 |
| 334.72 | 333.14 | 0.995 |
| 2 | 0.25 | 20.016 | 120 | 334.39 | 335.17 | 1.002 | 1.002 |
| 334.25 | 334.88 | 1.002 |
| 333.88 | 334.64 | 1.002 |
| 0.5 | 1 | 23.964 | 120 | 400.94 | 395.79 | 0.987 | 0.984 |
| 402.64 | 394.63 | 0.980 |
| 402.3 | 396.26 | 0.985 |
| 1 | 0.5 | 23.964 | 120 | 400.82 | 400.87 | 1.000 | 0.998 |
| 401.54 | 399.29 | 0.994 |
| 401.31 | 400.68 | 0.998 |
| 2 | 0.25 | 23.964 | 120 | 400.67 | 400.37 | 0.999 | 1.001 |
| 399.71 | 400.46 | 1.002 |
| 400.11 | 400.68 | 1.001 |
| 0.5 | 1 | 27.012 | 120 | 465.36 | 435.15 | 0.935 | 0.935 |
| 464.14 | 435.18 | 0.938 |
| 467.24 | 434.99 | 0.931 |
| 1 | 0.5 | 27.012 | 120 | 464.19 | 433.12 | 0.933 | 0.937 |
| 463.36 | 435.42 | 0.940 |
| 462.79 | 434.31 | 0.938 |
| 2 | 0.25 | 27.012 | 120 | 451.26 | 441.04 | 0.977 | 0.978 |
| 450.93 | 441.29 | 0.979 |
| 451.22 | 441.38 | 0.978 |
| 0.5 | 1 | 29.980 | 120 | 493.01 | 505.3 | 1.025 | 1.026 |
| 492.97 | 505.08 | 1.025 |
| 494.03 | 507.63 | 1.028 |
| 1 | 0.5 | 29.980 | 120 | 493.31 | 506.93 | 1.028 | 1.023 |
| 493.35 | 502.72 | 1.019 |
| 493.31 | 504.05 | 1.022 |
| 2 | 0.25 | 29.980 | 120 | 494.73 | 501.49 | 1.014 | 1.012 |
| 497.16 | 502.39 | 1.011 |
| 496.22 | 502.41 | 1.012 |

**Repeated Measurement**

For the repeated measurement only one data point per frequency was recorded.

|  |  |  |  |  |  |  |
| --- | --- | --- | --- | --- | --- | --- |
|  |  |  |  |  |  |  |
| 0.5 | 1 | 27.105 | 120 | 448.47 | 452.55 | 1.009 |
| 1 | 0.5 | 27.105 | 120 | 455.88 | 452.02 | 0.992 |
| 2 | 0.25 | 27.105 | 120 | 456.08 | 453.03 | 0.993 |

**Data for Plotting – Screening – Water**

|  |  | | |
| --- | --- | --- | --- |
|  | 1 | 0.5 | 0.25 |
|  |  |  |  |
| 17.023 | 0.946 | 0.989 | 0.993 |
| 20.016 | 0.993 | 0.998 | 1.002 |
| 23.964 | 0.984 | 0.998 | 1.001 |
| 27.012 | 0.935 | 0.937 | 0.978 |
| 29.980 | 1.026 | 1.023 | 1.012 |
| 27.1050 | 1.0091 | 0.9915 | 0.9933 |

- - 1. **Electromagnetic Actuator – Detailed Measurements – Water**

|  |  |  |  |  |  |  |  |
| --- | --- | --- | --- | --- | --- | --- | --- |
|  |  |  |  |  |  |  |  |
| 0.5 | 1 | 7.149 | 120 | 125.17 | 112.6 | 0.900 | 0.900 |
| 125.16 | 111.93 | 0.894 |
| 124.92 | 113.08 | 0.905 |
| 1 | 0.5 | 7.149 | 120 | 122.57 | 115.44 | 0.942 | 0.941 |
| 122.59 | 114.94 | 0.938 |
| 122.53 | 115.61 | 0.944 |
| 2 | 0.25 | 7.149 | 120 | 120.75 | 116.7 | 0.966 | 0.966 |
| 121.44 | 116.85 | 0.962 |
| 120.84 | 116.96 | 0.968 |
| 0.5 | 1 | 10.027 | 120 | 172.33 | 162.59 | 0.943 | 0.945 |
| 171.99 | 162.79 | 0.947 |
| 172.01 | 162.49 | 0.945 |
| 1 | 0.5 | 10.027 | 120 | 169.07 | 165.04 | 0.976 | 0.975 |
| 169.52 | 165.1 | 0.974 |
| 169.04 | 164.85 | 0.975 |
| 2 | 0.25 | 10.027 | 120 | 168.1 | 165.7 | 0.986 | 0.984 |
| 168.27 | 165.41 | 0.983 |
| 168.22 | 165.56 | 0.984 |
| 0.5 | 1 | 13.451 | 120 | 221.64 | 220.65 | 0.996 | 1.010 |
| 222.8 | 224.06 | 1.006 |
| 221.65 | 227.83 | 1.028 |
| 1 | 0.5 | 13.451 | 120 | 223.67 | 223.22 | 0.998 | 0.997 |
| 223.43 | 223.2 | 0.999 |
| 224.48 | 223.26 | 0.995 |
| 2 | 0.25 | 13.451 | 120 | 224.27 | 223.63 | 0.997 | 0.996 |
| 224.67 | 224.07 | 0.997 |
| 224.55 | 223.27 | 0.994 |
| 0.5 | 1 | 17.023 | 120 | 292.19 | 276.9 | 0.948 | 0.946 |
| 293.99 | 277.68 | 0.945 |
| 292.06 | 276.18 | 0.946 |
| 1 | 0.5 | 17.023 | 120 | 282.45 | 281.07 | 0.995 | 0.989 |
| 282.87 | 279.18 | 0.987 |
| 283.71 | 279.42 | 0.985 |
| 2 | 0.25 | 17.023 | 120 | 281.83 | 280.02 | 0.994 | 0.993 |
| 281.94 | 279.75 | 0.992 |
| 282.58 | 280.97 | 0.994 |

**Data for Plotting**

|  |  | | |
| --- | --- | --- | --- |
|  | 1 | 0.5 | 0.25 |
|  |  |  |  |
| 7.149 | 0.900 | 0.941 | 0.966 |
| 10.027 | 0.945 | 0.975 | 0.984 |
| 13.451 | 1.010 | 0.997 | 0.996 |
| 17.023 | 0.946 | 0.989 | 0.993 |

- - 1. **Electromagnetic Actuator – Data - Detailed Measurements – Ethanol (NT)**

|  |  |  |  |  |  |  |  |
| --- | --- | --- | --- | --- | --- | --- | --- |
|  |  |  |  |  |  |  |  |
| 0.5 | 1 | 5.378 | 60 | 33.23 | 37.82 | 0.879 | 0.879 |
| 32.29 | 37.52 | 0.861 |
| 33.38 | 37.18 | 0.898 |
| 1 | 0.5 | 5.378 | 60 | 33.83 | 36.14 | 0.936 | 0.938 |
| 33.98 | 36.08 | 0.942 |
| 33.91 | 36.22 | 0.936 |
| 2 | 0.25 | 5.378 | 60 | 33.75 | 35.66 | 0.946 | 0.964 |
| 34.63 | 35.74 | 0.969 |
| 34.91 | 35.76 | 0.976 |
| 0.5 | 1 | 8.953 | 60 | 53.25 | 64.9 | 0.820 | 0.824 |
| 53.5 | 64.53 | 0.829 |
| 53.25 | 64.74 | 0.823 |
| 1 | 0.5 | 8.953 | 60 | 55.82 | 62.18 | 0.898 | 0.908 |
| 56.46 | 61.26 | 0.922 |
| 55.89 | 61.83 | 0.904 |
| 2 | 0.25 | 8.953 | 60 | 57.78 | 60.22 | 0.959 | 0.955 |
| 57.53 | 60.31 | 0.954 |
| 57.6 | 60.61 | 0.950 |
| 0.5 | 1 | 13.483 | 60 | 80.44 | 96.31 | 0.835 | 0.833 |
| 80.95 | 97.29 | 0.832 |
| 80.84 | 97.09 | 0.833 |
| 1 | 0.5 | 13.483 | 60 | 84.42 | 93.26 | 0.905 | 0.908 |
| 84.63 | 93.03 | 0.910 |
| 84.66 | 93 | 0.910 |
| 2 | 0.25 | 13.483 | 60 | 86.75 | 90.79 | 0.956 | 0.954 |
| 86.66 | 90.73 | 0.955 |
| 86.7 | 91.07 | 0.952 |
| 0.5 | 1 | 16.522 | 60 | 102.19 | 115.39 | 0.886 | 0.878 |
| 101.59 | 116.73 | 0.870 |
| 101.88 | 115.85 | 0.879 |
| 1 | 0.5 | 16.522 | 60 | 102.17 | 116.63 | 0.876 | 0.877 |
| 102.08 | 116.47 | 0.876 |
| 101.68 | 115.84 | 0.878 |
| 2 | 0.25 | 16.522 | 60 | 105.12 | 112.72 | 0.933 | 0.933 |
| 105.63 | 112.51 | 0.939 |
| 105.03 | 113.1 | 0.929 |

**Data for plotting - NT funnel**

|  |  | | |
| --- | --- | --- | --- |
|  | 1 | 0.5 | 0.25 |
|  |  |  |  |
| 5.378 | 0.879 | 0.938 | 0.964 |
| 8.953 | 0.824 | 0.908 | 0.955 |
| 13.483 | 0.833 | 0.908 | 0.954 |
| 16.522 | 0.770 | 0.878 | 0.933 |

- - 1. **Electromagnetic Actuator – Data - Detailed Measurements – Ethanol (VS)**

|  | |  |  |  |  |  |  |  |
| --- | --- | --- | --- | --- | --- | --- | --- | --- |
|  | |  |  |  |  |  |  |  |
| 0.5 | 1 | | 5.639 | 60 | 35.31 | 39.15 | 0.902 |  |
| 35.2 | 38.64 | 0.911 | 0.901 |
| 34.88 | 38.88 | 0.897 |  |
| 1 | 0.5 | | 5.639 | 60 | 35.92 | 38.34 | 0.937 |  |
| 34.78 | 38.43 | 0.905 | 0.925 |
| 35.23 | 37.7 | 0.934 |  |
| 2 | 0.25 | | 5.639 | 60 | 36.78 | 37.7 | 0.976 |  |
| 36.76 | 37.55 | 0.979 | 0.982 |
| 37.16 | 37.45 | 0.992 |  |
| 0.5 | 1 | | 7.999 | 60 | 49.2 | 57.27 | 0.859 |  |
| 49.15 | 56.65 | 0.868 | 0.874 |
| 49.35 | 55.06 | 0.896 |  |
| 1 | 0.5 | | 7.999 | 60 | 51.2 | 51.23 | 0.999 |  |
| 51.06 | 52.34 | 0.976 | 0.990 |
| 51.04 | 51.26 | 0.996 |  |
| 2 | 0.25 | | 7.999 | 60 | 52.31 | 54.22 | 0.965 |  |
| 52.79 | 54.74 | 0.964 | 0.964 |
| 52.67 | 54.69 | 0.963 |  |
| 0.5 | 1 | | 13.478 | 60 | 82.04 | 94.52 | 0.868 |  |
| 81.83 | 94.53 | 0.866 | 0.863 |
| 81.17 | 94.74 | 0.857 |  |
| 1 | 0.5 | | 13.478 | 60 | 85.65 | 89.86 | 0.953 |  |
| 84.18 | 90.71 | 0.928 | 0.935 |
| 84.11 | 90.9 | 0.925 |  |
| 2 | 0.25 | | 13.478 | 60 | 86.92 | 88.46 | 0.983 |  |
| 86.31 | 89.36 | 0.966 | 0.972 |
| 86.63 | 89.65 | 0.966 |  |
| 0.5 | 1 | | 16.634 | 60 | 99.9 | 119.01 | 0.839 |  |
| 100.54 | 118.59 | 0.848 | 0.846 |
| 100.87 | 118.51 | 0.851 |  |
| 1 | 0.5 | | 16.634 | 60 | 105.5 | 112.25 | 0.940 |  |
| 106.03 | 112.94 | 0.939 | 0.937 |
| 105.44 | 113.17 | 0.932 |  |
| 2 | 0.25 | | 16.634 | 60 | 106.93 | 111.17 | 0.962 |  |
| 106.97 | 111.68 | 0.958 | 0.961 |
| 106.94 | 110.89 | 0.964 |  |

**Data for Plotting - VS funnel**

|  |  | | |
| --- | --- | --- | --- |
|  | 1 | 0.5 | 0.25 |
|  |  |  |  |
| 5.639 | 0.901 | 0.925 | 0.982 |
| 7.999 | 0.874 | 0.990 | 0.964 |
| 13.478 | 0.863 | 0.935 | 0.972 |
| 16.634 | 0.846 | 0.937 | 0.961 |

- - 1. **Electromagnetic Actuator – Pump Calibration – Water**

|  |  |  |  |
| --- | --- | --- | --- |
|  |  |  |  |
| 120 | 238.17 | 7.158 | 7.149 |
| 237.61 | 7.141 |
| 237.8 | 7.147 |
| 120 | 333.56 | 10.025 | 10.027 |
| 333.16 | 10.013 |
| 334.2 | 10.044 |
| 120 | 448.1 | 13.467 | 13.451 |
| 447.54 | 13.450 |
| 447.01 | 13.434 |
| 120 | 565.94 | 17.009 | 17.023 |
| 566.52 | 17.026 |
| 566.79 | 17.034 |
| 120 | 664.29 | 19.965 | 20.016 |
| 666.85 | 20.042 |
| 666.85 | 20.042 |
| 120 | 797.39 | 23.965 | 23.964 |
| 797.2 | 23.959 |
| 797.5 | 23.968 |
| 120 | 898.91 | 27.016 | 27.012 |
| 900.48 | 27.063 |
| 896.96 | 26.957 |
| 120 | 996.92 | 29.962 | 29.980 |
| 999.07 | 30.026 |
| 996.59 | 29.952 |

- - 1. **Electromagnetic Actuator – Pump Calibration – Ethanol**

|  |  |  |  |
| --- | --- | --- | --- |
|  |  |  |  |
| 70.67 | 60 | 5.374 | 5.378 |
| 70.73 | 5.379 |
| 70.75 | 5.380 |
| 74.12 | 60 | 5.637 | 5.639 |
| 74.57 | 5.671 |
| 73.78 | 5.611 |
| 104.64 | 60 | 7.957 | 7.999 |
| 105.29 | 8.007 |
| 105.63 | 8.033 |
| 132.24 | 60 | 10.056 | 10.102 |
| 132.45 | 10.072 |
| 133.82 | 10.176 |
| 177.25 | 60 | 13.479 | 13.478 |
| 177.34 | 13.486 |
| 177.12 | 13.469 |
| 218.71 | 60 | 16.632 | 16.634 |
| 218.63 | 16.626 |
| 218.88 | 16.645 |
| 117.78 | 60 | 8.957 | 8.953 |
| 117.57 | 8.941 |
| 117.86 | 8.963 |
| 177.38 | 60 | 13.489 | 13.483 |
| 177.64 | 13.509 |
| 176.88 | 13.451 |
| 217.04 | 60 | 16.505 | 16.522 |
| 217.44 | 16.535 |
| 217.33 | 16.527 |
